# Supplementary material
Source: PubMed Central journal article supplement (PMC4007584)
Supplement: NIHMS572522-supplement-Supplementary_Data.pdf [file NIHMS572522-supplement-Supplementary_Data.pdf]

## Supplementary Material

“Identification and optimization of PDE10A inhibitors using fragment-based screening by nanocalorimetry and X-ray crystallography”

Michael I. Recht<sup>1\*</sup>, Vandana Sridhar<sup>2</sup>, John Badger<sup>2</sup>, Pierre-Yves Bounaud<sup>2</sup>, Cheyenne Logan<sup>2</sup>, Barbara Chie-Leon<sup>2</sup>, Vicki Nienaber<sup>2</sup>, Francisco E. Torres<sup>1</sup>

<sup>1</sup>Palo Alto Research Center, 3333 Coyote Hill Road, Palo Alto, CA 94304

<sup>2</sup>Zenobia Therapeutics, 3550 General Atomics Court, Building 2, Room 435, San Diego, CA 92121

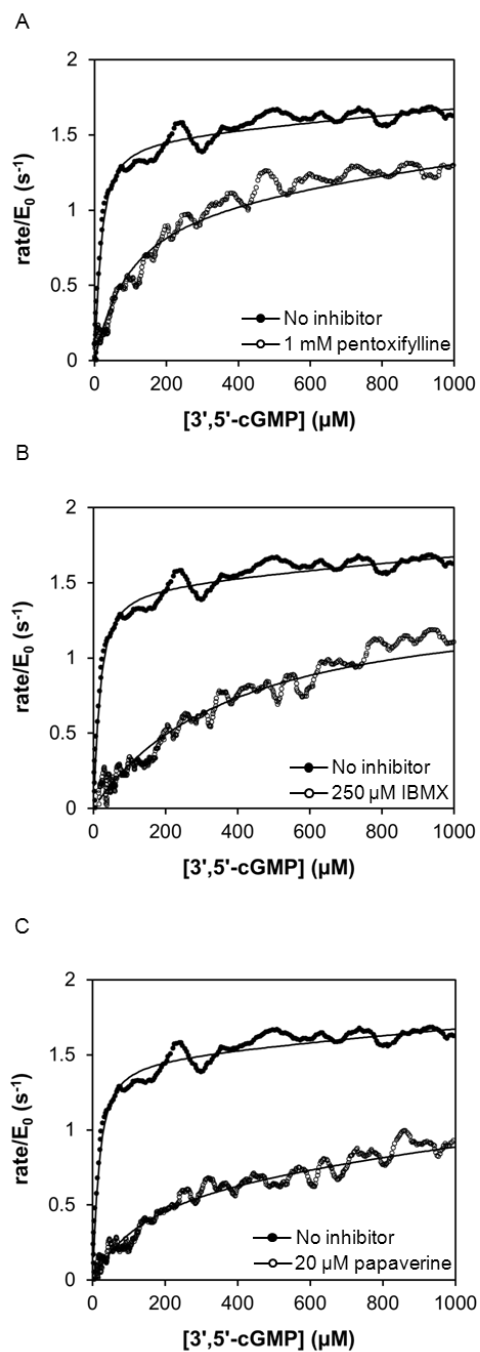

**Figure S1** PDE10A hydrolysis of 3',5'-cGMP in the absence (solid) and presence (open) of known general phosphodiesterase inhibitors. Reactions contained 15  $\mu\text{M}$  PDE10A and 2 mM 3',5'-cGMP. Solid curves are fit of data to equation 2. Fitting the solid black points (no inhibitor) yielded  $k_{\text{cat}} = 1.2 \text{ s}^{-1}$  and  $K_M = 12 \mu\text{M}$ , compared to  $k_{\text{cat}} = 1.2 \text{ s}^{-1}$  and  $K_M = 4.4 \mu\text{M}$  for the catalytic domain of PDE4A using a radioactivity-

based assay <sup>1</sup>. (A) Rate versus remaining 3',5'-cGMP concentration in the absence and presence of 1 mM pentoxifylline. (B) Rate versus remaining 3',5'- cGMP concentration in the absence and presence of 250  $\mu$ M 3-isobutyl-1-methylxanthine (IBMX). (C) Rate versus remaining 3',5'- cGMP concentration in the absence and presence of 20  $\mu$ M papaverine.

**Table S1.** Crystallographic data collection and refinement statistics for crystals in which bound fragments were identified. Values given in parenthesis are for data in the highest resolution shells. The percentages of amino acids in the allowed region of the Ramachandran plot were calculated by the PDB Validation Server (<http://validate.rcsb.org>)

| PDB ID                          | 4LKQ                                          | 4MRW                                          | 4MSH                                          | 4LLJ                                          | 4LLK                                          | 4LLP                                          | 4MRZ                                          | 4LLX                                          | 4MSO                                          |
|---------------------------------|-----------------------------------------------|-----------------------------------------------|-----------------------------------------------|-----------------------------------------------|-----------------------------------------------|-----------------------------------------------|-----------------------------------------------|-----------------------------------------------|-----------------------------------------------|
| Compound ID                     | ZT017                                         | ZT120                                         | ZT143                                         | ZT214                                         | ZT217                                         | ZT401                                         | ZT429                                         | ZT434                                         | ZT443                                         |
| <b>Data Collection</b>          |                                               |                                               |                                               |                                               |                                               |                                               |                                               |                                               |                                               |
| Space group                     | P2 <sub>1</sub> 2 <sub>1</sub> 2 <sub>1</sub> |
| Unit cell (a,b,c) (Å)           | 50.979,<br>82.100,<br>155.621                 | 51.830,<br>82.231,<br>155.382                 | 50.005,<br>82.068,<br>156.327                 | 50.744,<br>82.057,<br>155.436                 | 51.313,<br>82.160,<br>155.554                 | 50.383,<br>82.558,<br>154.746                 | 51.140,<br>82.133,<br>154.745                 | 51.791,<br>82.141,<br>154.877                 | 51.304,<br>82.380,<br>155.611                 |
| Resolution (Å)                  | 1.62                                          | 1.96                                          | 2.30                                          | 1.56                                          | 1.55                                          | 1.75                                          | 1.58                                          | 1.76                                          | 1.79                                          |
| R <sub>merge</sub>              | 0.069<br>(0.591)                              | 0.139<br>(0.544)                              | 0.131<br>(0.706)                              | 0.059<br>(0.566)                              | 0.057<br>(0.591)                              | 0.051<br>(0.571)                              | 0.054<br>(0.583)                              | 0.068<br>(0.573)                              | 0.062<br>(0.585)                              |
| Completeness (%)                | 99.9<br>(99.6)                                | 99.4<br>(99.9)                                | 70.7<br>(64.8)                                | 97.6<br>(82.3)                                | 98.3<br>(93.3)                                | 99.7<br>(99.6)                                | 99.6<br>(99.2)                                | 99.9<br>(100.0)                               | 97.7<br>(96.6)                                |
| No. observed refs               | 497662                                        | 355501                                        | 104746                                        | 531234                                        | 524979                                        | 397997                                        | 411350                                        | 344342                                        | 301412                                        |
| No. unique refs                 | 83936                                         | 48142                                         | 20880                                         | 91255                                         | 94258                                         | 65994                                         | 89781                                         | 66913                                         | 61338                                         |
| Mean I/σ(I)                     | 22.4<br>(2.8)                                 | 11.9<br>(2.1)                                 | 9.0<br>(2.3)                                  | 26.2<br>(2.6)                                 | 24.9<br>(2.8)                                 | 30.7<br>(3.5)                                 | 24.2<br>(2.4)                                 | 21.7<br>(2.8)                                 | 22.4<br>(2.3)                                 |
| Multiplicity                    | 5.9 (5.4)                                     | 7.4 (6.3)                                     | 5.0 (5.9)                                     | 5.8 (4.8)                                     | 5.6 (5.3)                                     | 6.0 (6.0)                                     | 4.6 (4.5)                                     | 5.1 (5.2)                                     | 4.9 (4.4)                                     |
| <b>Refinement</b>               |                                               |                                               |                                               |                                               |                                               |                                               |                                               |                                               |                                               |
| No. of work reflections         | 79657                                         | 45507                                         | 19755                                         | 86595                                         | 89457                                         | 62574                                         | 85147                                         | 63435                                         | 57938                                         |
| No. of free reflections         | 4189                                          | 2426                                          | 1068                                          | 4567                                          | 4724                                          | 3344                                          | 4495                                          | 3384                                          | 3097                                          |
| No. of atoms                    | 5635                                          | 5619                                          | 5344                                          | 5598                                          | 5714                                          | 5318                                          | 5645                                          | 5698                                          | 5489                                          |
| R <sub>work</sub>               | 0.205                                         | 0.228                                         | 0.232                                         | 0.210                                         | 0.205                                         | 0.213                                         | 0.207                                         | 0.205                                         | 0.251                                         |
| R <sub>free</sub>               | 0.235                                         | 0.279                                         | 0.289                                         | 0.243                                         | 0.232                                         | 0.246                                         | 0.236                                         | 0.246                                         | 0.295                                         |
| Mean B factor (Å <sup>2</sup> ) | 30.2                                          | 22.6                                          | 29.7                                          | 32.5                                          | 25.3                                          | 34.7                                          | 31.2                                          | 29.6                                          | 38.0                                          |
| R.m.s.d. bond lengths (Å)       | 0.014                                         | 0.011                                         | 0.007                                         | 0.015                                         | 0.014                                         | 0.012                                         | 0.011                                         | 0.014                                         | 0.013                                         |
| R.m.s.d. bond angles (°)        | 1.389                                         | 1.203                                         | 0.995                                         | 1.436                                         | 1.364                                         | 1.276                                         | 1.226                                         | 1.337                                         | 1.324                                         |
| Ramachandran plot (% allowed)   | 99.5                                          | 98.8                                          | 98.5                                          | 98.9                                          | 99.7                                          | 99.1                                          | 99.2                                          | 99.4                                          | 99.2                                          |

| PDB ID                             | 4LM0                                          | 4MSA                                          | 4LM1                                          | 4MSN                                          | 4LM2                                          | 4LM3                                          | 4LM4                                          | 4MSC                                          | 4MSE                                          |
|------------------------------------|-----------------------------------------------|-----------------------------------------------|-----------------------------------------------|-----------------------------------------------|-----------------------------------------------|-----------------------------------------------|-----------------------------------------------|-----------------------------------------------|-----------------------------------------------|
| Compound ID                        | ZT448                                         | ZT449                                         | ZT450                                         | ZT451                                         | ZT462                                         | ZT464                                         | ZT902                                         | ZT1595                                        | ZT1597                                        |
| <b>Data Collection</b>             |                                               |                                               |                                               |                                               |                                               |                                               |                                               |                                               |                                               |
| Space group                        | P2 <sub>1</sub> 2 <sub>1</sub> 2 <sub>1</sub> |
| Unit cell (a,b,c)<br>(Å)           | 50.598,<br>82.041,<br>155.687                 | 51.202,<br>82.168,<br>155.075                 | 52.127,<br>82.335,<br>154.846                 | 49.859,<br>82.158,<br>156.130                 | 52.184,<br>82.383,<br>155.130                 | 51.893,<br>82.146,<br>155.085                 | 50.892,<br>82.076,<br>155.512                 | 51.380,<br>82.085,<br>155.926                 | 50.652,<br>81.819,<br>156.850                 |
| Resolution (Å)                     | 1.66                                          | 1.62                                          | 1.60                                          | 2.30                                          | 1.55                                          | 1.49                                          | 1.48                                          | 2.47                                          | 2.83                                          |
| R <sub>merge</sub>                 | 0.067<br>(0.504)                              | 0.076<br>(0.570)                              | 0.061<br>(0.399)                              | 0.120<br>(0.479)                              | 0.058<br>(0.557)                              | 0.060<br>(0.578)                              | 0.067<br>(0.576)                              | 0.085<br>(0.581)                              | 0.084<br>(0.586)                              |
| Completeness<br>(%)                | 98.6<br>(90.3)                                | 96.1<br>(97.4)                                | 97.6<br>(81.8)                                | 95.8<br>(94.2)                                | 96.2<br>(76.6)                                | 99.5<br>(98.2)                                | 99.6<br>(97.2)                                | 99.9<br>(100.0)                               | 99.9<br>(100.0)                               |
| No. observed refs                  | 446626                                        | 327616                                        | 485902                                        | 114832                                        | 513852                                        | 641230                                        | 643853                                        | 134032                                        | 88461                                         |
| No. unique refs                    | 76392                                         | 80392                                         | 86792                                         | 28032                                         | 93768                                         | 108380                                        | 108799                                        | 24593                                         | 16439                                         |
| Mean I/σ(I)                        | 23.8<br>(2.5)                                 | 16.5<br>(2.5)                                 | 23.5<br>(2.8)                                 | 8.8<br>(2.5)                                  | 24.9<br>(2.0)                                 | 24.6<br>(2.7)                                 | 22.8<br>(2.6)                                 | 17.4<br>(3.4)                                 | 17.8<br>(3.3)                                 |
| Multiplicity                       | 5.8 (4.7)                                     | 4.1 (4.2)                                     | 5.6 (4.5)                                     | 4.1 (3.9)                                     | 5.5 (4.2)                                     | 5.9 (5.1)                                     | 5.9 (5.2)                                     | 5.5 (5.5)                                     | 5.4 (5.4)                                     |
| <b>Refinement</b>                  |                                               |                                               |                                               |                                               |                                               |                                               |                                               |                                               |                                               |
| No. of work reflections            | 72469                                         | 76291                                         | 82265                                         | 26584                                         | 88932                                         | 102889                                        | 103262                                        | 23287                                         | 15566                                         |
| No. of free reflections            | 3835                                          | 4031                                          | 5342                                          | 1405                                          | 4693                                          | 5407                                          | 5428                                          | 1255                                          | 829                                           |
| No. of atoms                       | 5694                                          | 5681                                          | 5772                                          | 5390                                          | 5705                                          | 5856                                          | 5700                                          | 5283                                          | 5330                                          |
| R <sub>work</sub>                  | 0.199                                         | 0.196                                         | 0.211                                         | 0.231                                         | 0.209                                         | 0.200                                         | 0.201                                         | 0.240                                         | 0.271                                         |
| R <sub>free</sub>                  | 0.230                                         | 0.220                                         | 0.249                                         | 0.288                                         | 0.247                                         | 0.225                                         | 0.223                                         | 0.287                                         | 0.342                                         |
| Mean B factor<br>(Å <sup>2</sup> ) | 30.9                                          | 24.9                                          | 28.0                                          | 31.4                                          | 27.3                                          | 26.3                                          | 24.5                                          | 61.9                                          | 87.026                                        |
| R.m.s.d. bond lengths (Å)          | 0.014                                         | 0.012                                         | 0.014                                         | 0.008                                         | 0.016                                         | 0.011                                         | 0.011                                         | 0.009                                         | 0.007                                         |
| R.m.s.d. bond angles (°)           | 1.373                                         | 1.264                                         | 1.436                                         | 1.087                                         | 1.485                                         | 1.275                                         | 1.265                                         | 1.133                                         | 1.029                                         |
| Ramachandran plot (% allowed)      | 99.1                                          | 99.2                                          | 99.4                                          | 98.0                                          | 99.4                                          | 99.5                                          | 99.2                                          | 96.9                                          | 96.8                                          |

**Table S2.** Crystallographic data collection and refinement statistics for crystals in which no bound fragments were identified.

| Compound ID               | ZT0106        | ZT0415        | ZT0419        | ZT0427        | ZT0431        | ZT0447        | ZT0581        | ZT0826        |
|---------------------------|---------------|---------------|---------------|---------------|---------------|---------------|---------------|---------------|
| Resolution (Å)            | 1.76          | 1.85          | 1.93          | 1.5           | 1.99          | 1.8           | 1.48          | 1.46          |
| R <sub>merge</sub>        | 0.078         | 0.076         | 0.073         | 0.072         | 0.095         | 0.071         | 0.056         | 0.052         |
| Mean I/σ(I)               | 21.9<br>(3.0) | 18.8<br>(2.4) | 18.6<br>(2.2) | 22.3<br>(3.7) | 15.9<br>(3.3) | 19.7<br>(2.8) | 27.9<br>(2.6) | 29.2<br>(2.6) |
| R <sub>work</sub>         | 0.2133        | 0.2285        | 0.2280        | 0.2130        | 0.2378        | 0.2224        | 0.2217        | 0.2174        |
| R <sub>free</sub>         | 0.2548        | 0.2646        | 0.2758        | 0.2344        | 0.2835        | 0.2545        | 0.2377        | 0.2408        |
| R.m.s.d. bond lengths (Å) | 0.009         | 0.012         | 0.013         | 0.006         | 0.015         | 0.010         | 0.007         | 0.007         |

### Synthesis of ZT1595

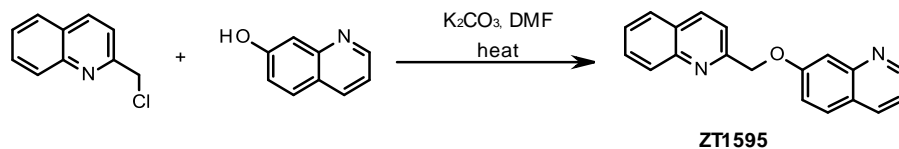

A mixture of 2-(chloromethyl)quinoline (80 mg, 0.38 mmol), quinolin-7-ol (50 mg, 0.34 mmol) and  $K_2CO_3$  (143 mg, 1.02 mmol) in DMF (5.0 mL) was heated at 90°C for 4 h. The mixture was cooled to room temperature, poured into water and extracted with ethyl acetate. The combined extracts were washed with brine, dried over anhydrous  $Na_2SO_4$  and concentrated. The residue was purified by flash column chromatography on silica gel (Pet.Ether:EtOAc = 4:1 to 1:1) to give **ZT1595** (48 mg, 49% yield) as a light yellow solid.  $^1H$  NMR (300 MHz, DMSO- $d_6$ ):  $\delta$  8.81 (m, 1H), 8.42 (m, 1H), 8.37 (m, 1H), 8.02-7.83 (m, 3H), 7.82-7.75 (m, 2H), 7.65-7.54 (m, 1H), 7.43-7.35 (m, 3H), 5.56 (s, 2H). MS (ESI):  $m/z$  287.0  $[M+H]^+$ .

### Synthesis of ZT1597

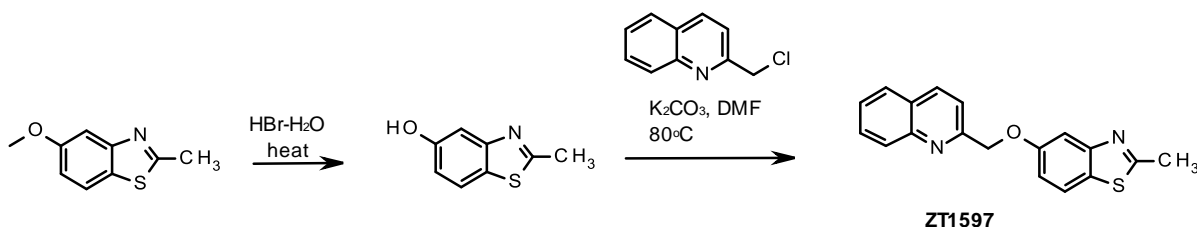

#### Step 1: 2-Methylbenzo[d]thiazol-5-ol

A suspension of 5-methoxy-2-methylbenzo[d]thiazole (1.0 g, 5.7 mmol) in 48% HBr/ $H_2O$  (10 mL) was heated at 105°C overnight. The mixture was cooled to room temperature and the precipitate was collected by filtration, washed with acetone and dried under vacuum to give 2-methylbenzo[d]thiazol-5-ol (580 mg, 62% yield) as a white solid.

#### Step 2: ZT1597

A mixture of 2-methylbenzo[d]thiazol-5-ol (165 mg, 1.0 mmol), 2-(chloromethyl)quinoline (212 mg, 1.32 mmol) and  $K_2CO_3$  (346 mg, 2.5 mmol) in DMF (8.0 mL) was heated at 80°C for 3h. The mixture was cooled to room temperature and poured into water. The resulting mixture was extracted with ethyl acetate and the combined extracts were washed with brine, dried over anhydrous  $Na_2SO_4$  and concentrated. The residue was purified by flash column chromatography on silica gel (DCM/MeOH= 100:1) to afford **ZT1597** (100 mg, 33% yield) as a yellow solid.  $^1H$  NMR (300 MHz,  $CDCl_3$ ):  $\delta$  8.20 (m, 2H), 7.88-7.70 (m, 3H), 7.62-7.56 (m, 2H), 7.16 (dd,  $J$ = 2.5, 8.8 Hz, 1H), 5.51 (s, 2H), 2.82 (s, 3H); MS (ESI):  $m/z$  307.0  $[M+H]^+$ .

### Synthesis of ZT1598

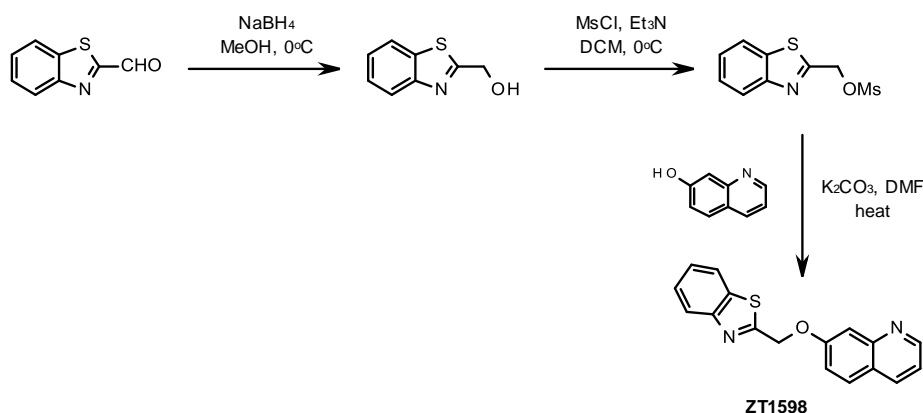

### Step 1: Benzo[d]thiazol-2-ylmethanol

Sodium borohydride (0.38 g, 10.0 mmol) was added slowly to a solution of 1,3-benzothiazole-2-carbaldehyde (1.63 g, 10.0 mmol) in methanol (10.0 mL) at 0°C. The reaction mixture was stirred at 0°C for 4 h and saturated NH<sub>4</sub>Cl solution was added. The resulting mixture was extracted with dichloromethane. The combined extracts were washed with brine, dried over anhydrous Na<sub>2</sub>SO<sub>4</sub> and concentrated to give benzo[d]thiazol-2-ylmethanol (1.47 g, 89% yield).

### Step 2: Benzo[d]thiazol-2-ylmethyl methanesulfonate

To a solution of benzo[d]thiazol-2-ylmethanol (1.0 g, 6.02 mmol) in DCM (10.0 mL) at room temperature was added triethylamine (1.68 mL, 12.04 mmol). After the mixture was cooled to 0°C, a solution of methanesulfonyl chloride (0.60 mL, 7.75 mol) in DCM (5.0 mL) was added dropwise over 0.5 h. The reaction mixture was stirred at 0°C for an additional hour and saturated NaHCO<sub>3</sub> solution was added. The resulting mixture was extracted with dichloromethane and the combined extracts were washed with brine, dried over anhydrous Na<sub>2</sub>SO<sub>4</sub> and concentrated to give benzo[d]thiazol-2-ylmethyl methanesulfonate (1.1 g, 75% yield), which was used in the next step without further purification.

### Step 3: ZT1598

A mixture of benzo[d]thiazol-2-ylmethyl methanesulfonate (140 mg, 0.58 mmol), quinolin-7-ol (75 mg, 0.52 mmol) and K<sub>2</sub>CO<sub>3</sub> (159 mg, 1.15 mmol) in DMF (5.0 mL) was heated at 90°C for 12 h. The mixture was cooled to room temperature, poured into water and extracted with ethyl acetate. The combined extracts were washed with brine, dried over anhydrous Na<sub>2</sub>SO<sub>4</sub> and concentrated. The residue was purified by flash column chromatography on silica gel (Pet.Ether:EtOAc = 4:1 to 1:1) to give **ZT1598** (23 mg, 14% yield) as a light yellow solid. <sup>1</sup>H NMR (300 MHz, CDCl<sub>3</sub>): δ 8.82 (m, 1H), 8.26 (m, 1H), 8.16 (m, 1H), 7.89 (m, 1H), 7.821 (m, 1H), 7.64 (m, 1H), 7.46-7.33 (m, 4H), 5.38 (s, 2H). MS (ESI): *m/z* 293.0 [M+H]<sup>+</sup>.

### Synthesis of ZT1638

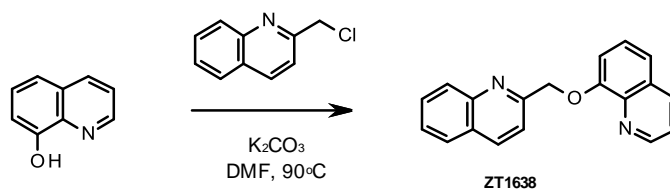



A mixture of 2-(chloromethyl)quinoline (200 mg, 0.93 mmol), quinolin-8-ol (136 mg, 0.93 mmol) and  $K_2CO_3$  (258 mg, 1.87 mmol) in DMF (10.0 mL) was heated at 90°C for 1 h. The mixture was cooled to room temperature and poured into water. The resulting mixture was extracted with ethyl acetate and the combined extracts were washed with brine, dried over anhydrous  $Na_2SO_4$  and concentrated. The residue was purified by flash column chromatography on silica gel (Pet.Ether:EtOAc = 10:1 to 5:1) to give compound **ZT1638** (205 mg, 77% yield) as a light yellow solid.  $^1H$  NMR (300 MHz,  $CDCl_3$ ):  $\delta$  9.12 (m, 1H), 8.13 (m, 3H), 7.82-7.42 (m, 3H), 7.59 (m, 1H), 7.54 (m, 1H), 7.51-7.38 (m, 2H), 7.09 (m, 1H), 5.77 (s, 2H); MS (ESI):  $m/z$  287.0  $[M+H]^+$ .

### Synthesis of ZT1694

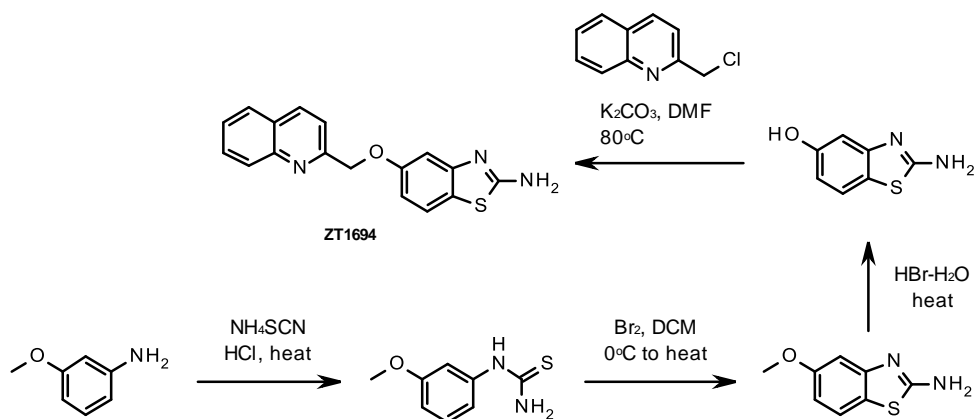

#### **Step 1: 3-Methoxyphenylthiourea**

A mixture of 3-methoxyaniline (10.0 g, 81.3 mmol) and  $NH_4SCN$  (6.18 g, 81.3 mmol) in 1 M HCl solution (82.0 mL) was heated at 100°C for 16 h. After the mixture was cooled to room temperature, it was diluted with water. The precipitate was collected by filtration, washed with water and ether and dried to give 3-methoxyphenylthiourea (7.36 g, 50% yield) as a yellow solid.

#### **Step 2: 5-Methoxybenzo[d]thiazol-2-amine**

To a suspension of 3-methoxyphenylthiourea (3.36 g, 18.46 mmol) in dichloromethane (37.0 mL) at 0°C was added dropwise a solution of bromine (7.66 g, 20.31 mmol) in dichloromethane (10.0 mL) over 30 min. The reaction mixture was stirred for 3 h and then heated under reflux for another 3 h. The precipitate was collected by filtration and washed with dichloromethane. The solid was suspended in saturated  $NaHCO_3$  solution and extracted with dichloromethane. The combined organic layers were washed with brine, dried over anhydrous  $Na_2SO_4$  and concentrated to afford 5-methoxybenzo[d]thiazol-2-amine (2.95 g, 89% yield) as a white solid.

#### **Step 3: 2-Aminobenzo[d]thiazol-5-ol**

A suspension of 5-methoxybenzo[d]thiazol-2-amine (1.5 g, 8.3 mmol) in 48% HBr/ $H_2O$  (14.0 mL) was heated at 105°C overnight. The mixture was cooled to room temperature and the precipitate was collected by filtration and washed with acetone to give 2-aminobenzo[d]thiazol-5-ol (0.8 g, 58% yield) as a white solid.

#### **Step 4: ZT1694**

A mixture of 2-aminobenzo[*d*]thiazol-5-ol (200 mg, 1.2 mmol), 2-(chloromethyl)quinoline (283 mg, 1.32 mmol) and K<sub>2</sub>CO<sub>3</sub> (415 mg, 3.0 mmol) in DMF (10.0 mL) was heated at 80°C for 3 h. The mixture was cooled to room temperature and poured into water. The resulting mixture was extracted with ethyl acetate and the combined extracts were washed with brine, dried over anhydrous Na<sub>2</sub>SO<sub>4</sub> and concentrated. The residue was purified by flash column chromatography on silica gel (DCM:MeOH = 60:1) to afford **ZT1694** (0.21 g, 58% yield) as a yellow solid. <sup>1</sup>H NMR (300 MHz, CDCl<sub>3</sub>): δ 8.42 (d, 1H), 8.12 (d, 1H), 7.94 (d, 1H), 7.81-7.76 (m, 2H), 7.63 (m, 1H), 7.58 (m, 1H), 7.16 (m, 1H), 6.86 (m, 3H), 5.40 (s, 2H); MS (ESI): *m/z* 308.0 [M+H]<sup>+</sup>.

### Synthesis of ZT1752

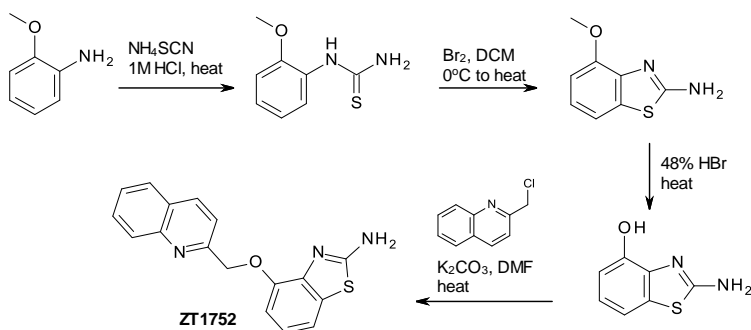

#### Step 1: 2-Methoxyphenylthiourea

A solution of 2-methoxyaniline (10.0 g, 81.3 mmol) and NH<sub>4</sub>SCN (6.18 g, 81.3 mmol) in 1 M HCl (82.0 mL) was stirred at 100°C for 16 h. After the mixture was cooled to room temperature, it was diluted with water and stirred at room temperature for 2 h. The precipitate was collected by filtration, washed with water and ether and dried under vacuum to give 2-methoxyphenylthiourea (7.5 g, 51% yield) as a yellow solid.

#### Step 2: 4-Methoxybenzo[*d*]thiazol-2-amine

To a suspension of 2-methoxyphenylthiourea (4.0 g, 21.98 mmol) in dichloromethane (37.0 mL) at 0°C was added a solution of bromine (3.9 g, 24.0 mmol) in dichloromethane (10.0 mL) dropwise over 30 min. The reaction mixture was stirred for 3 h and then heated under reflux for another 3 h. The precipitate was collected by filtration and washed with dichloromethane. The solid was suspended in saturated NaHCO<sub>3</sub> solution and the resulting mixture was extracted with dichloromethane. The combined organic layers were washed with brine, dried over anhydrous Na<sub>2</sub>SO<sub>4</sub> and concentrated to afford 4-methoxybenzo[*d*]thiazol-2-amine (1.0 g, 25% yield) as a white solid. <sup>1</sup>H NMR (300 MHz, CDCl<sub>3</sub>): δ 7.23 (d, *J* = 8.1 Hz, 1H), 7.10 (m, 1H), 6.83 (d, *J* = 8.1 Hz, 1H), 5.63 (br s, 2H), 3.91 (s, 3H). MS (ESI): *m/z* 180.9 [M+H]<sup>+</sup>.

#### Step 3: 2-Aminobenzo[*d*]thiazol-4-ol

A suspension of 4-methoxybenzo[*d*]thiazol-2-amine (500 mg, 2.78 mmol) in 48% HBr (10.0 mL) was heated at 105°C overnight. The mixture was cooled to room temperature and the precipitate was collected by filtration, washed with acetone and dried under vacuum to give 2-aminobenzo[*d*]thiazol-4-ol (320 mg, 69% yield) as a white solid.

#### Step 4: ZT1752

A mixture of 2-aminobenzo[*d*]thiazol-4-ol (320 mg, 1.93 mmol), 2-(chloromethyl)quinoline (454 mg, 2.1 mmol) and K<sub>2</sub>CO<sub>3</sub> (665 mg, 3.8 mmol) in DMF (10.0 mL) was heated at 80°C for 3 h. The mixture was cooled to room temperature, poured into water and extracted with ethyl acetate. The combined extracts were washed with brine, dried over anhydrous Na<sub>2</sub>SO<sub>4</sub> and concentrated. The residue was purified by flash column chromatography on silica gel (DCM/MeOH = 30:1) to afford **ZT1752** (200 mg, 34% yield) as a yellow solid. <sup>1</sup>H NMR (300 MHz, DMSO-*d*<sub>6</sub>): δ 8.45 (d, *J* = 8.1 Hz, 1H), 8.07 (m, 2H), 7.90 (m, 2H), 7.76 (m, 1H), 7.63 (m, 2H), 7.27 (m, 1H), 6.95 (m, 2H), 5.48 (s, 2H). MS (ESI): *m/z* 308.0 [M+H]<sup>+</sup>.

### Supplementary Material Reference

1. Wang H, Liu Y, Hou J, Zheng M, Robinson H, Ke H. Structural insight into substrate specificity of phosphodiesterase 10. *Proc. Natl. Acad. Sci. U. S. A.* **2007**; 104:5782-5787.
